# Supplementary material for: Preparation of PEI/CS aerogel beads with a high density of reactive sites for efficient Cr(vi) sorption: batch and column studies
Source: Royal Society of Chemistry journal article supplement (doi:10.1039/c7ra06914f), 2017-01-01
Supplement: c7ra06914f1.pdf [file c7ra06914f1.pdf]

## Electronic Supplementary Materials:

Preparation of PEI/CS aerogel beads with high-density of reactive sites for efficient Cr(VI) sorption: batch and column studies

Ran Li <sup>a</sup>, Qing-Da An <sup>a,\*</sup>, Zuo-Yi Xiao <sup>a</sup>, Bin Zhai <sup>a</sup>, Shang-Ru Zhai <sup>a,\*</sup>, Zhan Shi<sup>b</sup>

<sup>a</sup> *Faculty of Light Industry and Chemical Engineering, Dalian Polytechnic University, Dalian 116034*

<sup>b</sup> *State Key Laboratory of Inorganic Synthesis and Preparative Chemistry, College of Chemistry, Jilin University, Changchun 130012, China*

\*Corresponding authors,

E-mail: anqingda@dlpu.edu.cn (Q.-D. An); zhairs@dlpu.edu.cn (S.-R. Zhai)

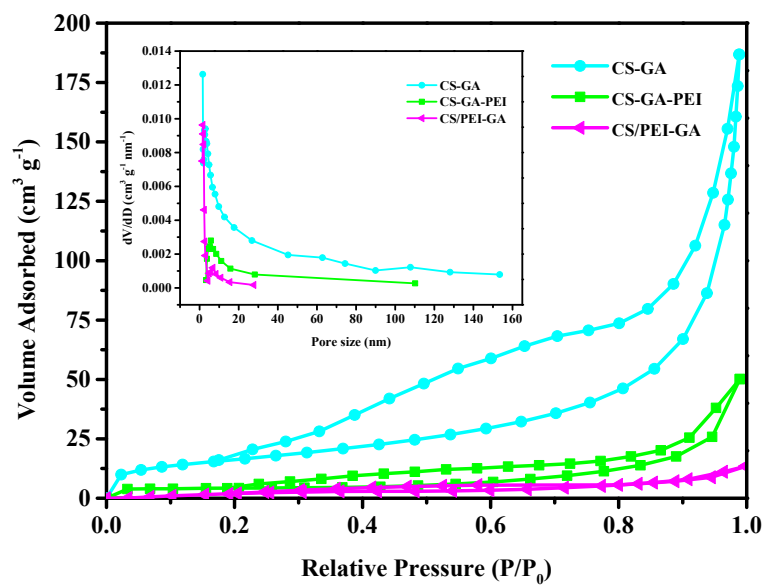

**Fig. S1.** Nitrogen adsorption–desorption isotherms and pore size distribution curves (*inset*) of CS-GA, CS-GA-PEI and CS/PEI-GA.

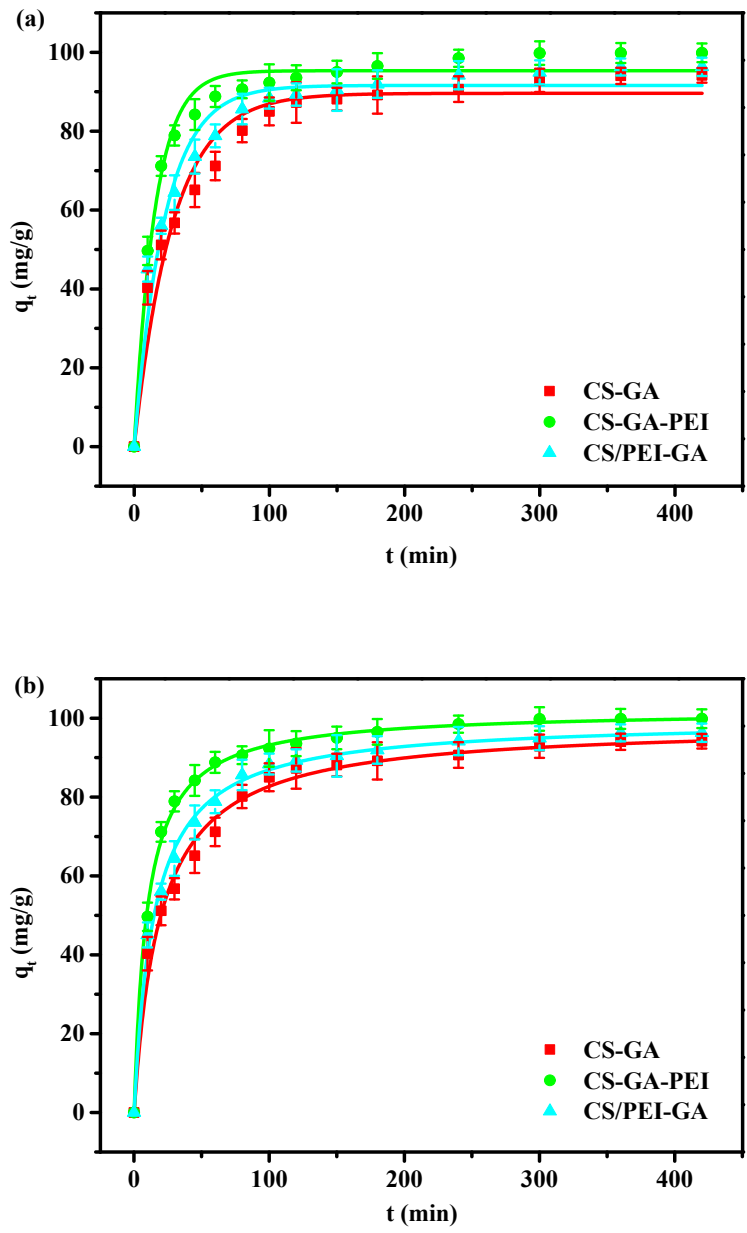

**Fig. S2.** Adsorption kinetics modeled with (a) pseudo-first-order equation and (b) pseudo-second-order equation of CS-GA, CS-GA-PEI and CS/PEI-GA beads.

**Table S1**

The textural parameters of the adsorbents.

| Sample    | Specific surface<br>area (m <sup>2</sup> g <sup>-1</sup> ) | Pore volume<br>(cm <sup>3</sup> g <sup>-1</sup> ) | Average pore<br>diameter (nm) |
|-----------|------------------------------------------------------------|---------------------------------------------------|-------------------------------|
| CS-GA     | 59.4                                                       | 0.29                                              | 19.5                          |
| CS-PEI-GA | 13.7                                                       | 0.08                                              | 22.7                          |
| CS/PEI-GA | 23.0                                                       | 0.02                                              | 3.8                           |

**Table S2**

The isotherm parameters for adsorption of Cr (VI) onto CS-GA, CS-GA-PEI and CS/PEI-GA beads.

| Materials | Langmuir model |          |         | Freundlich model |         |         |
|-----------|----------------|----------|---------|------------------|---------|---------|
|           | $q_m$ (mg/g)   | b (L/mg) | $R^2$   | $K_F$ (mg/g)     | n       | $R^2$   |
| CS-GA     | 284.6          | 0.11407  | 0.99146 | 88.583           | 4.41445 | 0.82053 |
| CS-GA-PEI | 402.9          | 0.19326  | 0.8728  | 163.089          | 5.10314 | 0.82825 |
| CS/PEI-GA | 363.1          | 0.11263  | 0.93926 | 108.646          | 4.0693  | 0.87997 |
